# Supplementary material for: A novel phosphotungstic acid-supported single metal atom catalyst with high activity and selectivity for the synthesis of NH3 from electrochemical N2 reduction: a DFT prediction
Source: Royal Society of Chemistry journal article supplement (doi:10.1039/c9ta06470b), 2019-01-01
Supplement: c9ta06470b1.pdf [file c9ta06470b1.pdf]

# Supporting Information

**A Novel Phosphotungstic Acid Supported Single Metal Atom Catalyst with High  
Activity and Selectivity for the Synthesis of NH<sub>3</sub> from Electrochemical N<sub>2</sub>  
Reduction : A DFT Prediction**

Liye Gao,<sup>1,†</sup> Feiteng Wang,<sup>2,†</sup> Ming-an Yu,<sup>1</sup> Fenfei Wei,<sup>1</sup> Jiamin Qi,<sup>1</sup> Sen Lin,<sup>1,\*</sup> and  
Daiqian Xie<sup>2,\*</sup>

*<sup>1</sup>State Key Laboratory of Photocatalysis on Energy and Environment, College of  
Chemistry, Fuzhou University, Fuzhou 350002, China*

*<sup>2</sup>Institute of Theoretical and Computational Chemistry, Key Laboratory of  
Mesoscopic Chemistry, School of Chemistry and Chemical Engineering, Nanjing  
University, Nanjing 210023, China.*

†These authors contributed equally to this work.

\*Corresponding author. Email: [slin@fzu.edu.cn](mailto:slin@fzu.edu.cn) and [dqxie@nju.edu.cn](mailto:dqxie@nju.edu.cn)

Table S1. Calculated vibrational frequencies, zero point energies and entropy of different adsorption species, where the \* denotes the adsorption site. Note that \*N≡\*N and \*N≡N represent the side-on and end-on adsorption configurations, respectively.

| Adsorption Species                 | $E_{\text{ZPE}}$<br>(eV) | $TS$<br>(eV) |
|------------------------------------|--------------------------|--------------|
| H <sub>2</sub>                     | 0.27                     | 0.40         |
| N <sub>2</sub>                     | 0.15                     | 0.59         |
| *N≡*N                              | 0.20                     | 0.13         |
| *N=*NH                             | 0.50                     | 0.12         |
| *N-*NH <sub>2</sub>                | 0.84                     | 0.09         |
| *NH-*NH <sub>2</sub>               | 1.12                     | 0.15         |
| *NH <sub>2</sub> -*NH <sub>2</sub> | 1.47                     | 0.12         |
| *NH <sub>2</sub> -*NH <sub>3</sub> | 1.68                     | 0.18         |
| *N                                 | 0.09                     | 0.06         |
| *NH                                | 0.35                     | 0.10         |
| *NH <sub>2</sub>                   | 0.67                     | 0.12         |
| *NH <sub>3</sub>                   | 1.03                     | 0.16         |
| *N≡N                               | 0.20                     | 0.18         |
| *N=*NH                             | 0.46                     | 0.20         |
| *NH-NH                             | 0.81                     | 0.20         |
| *NH-NH <sub>2</sub>                | 1.14                     | 0.21         |
| *NH <sub>2</sub> -NH <sub>2</sub>  | 1.49                     | 0.21         |
| *N-NH <sub>2</sub>                 | 0.81                     | 0.20         |
| NH <sub>3</sub>                    | 0.89                     | 0.60         |

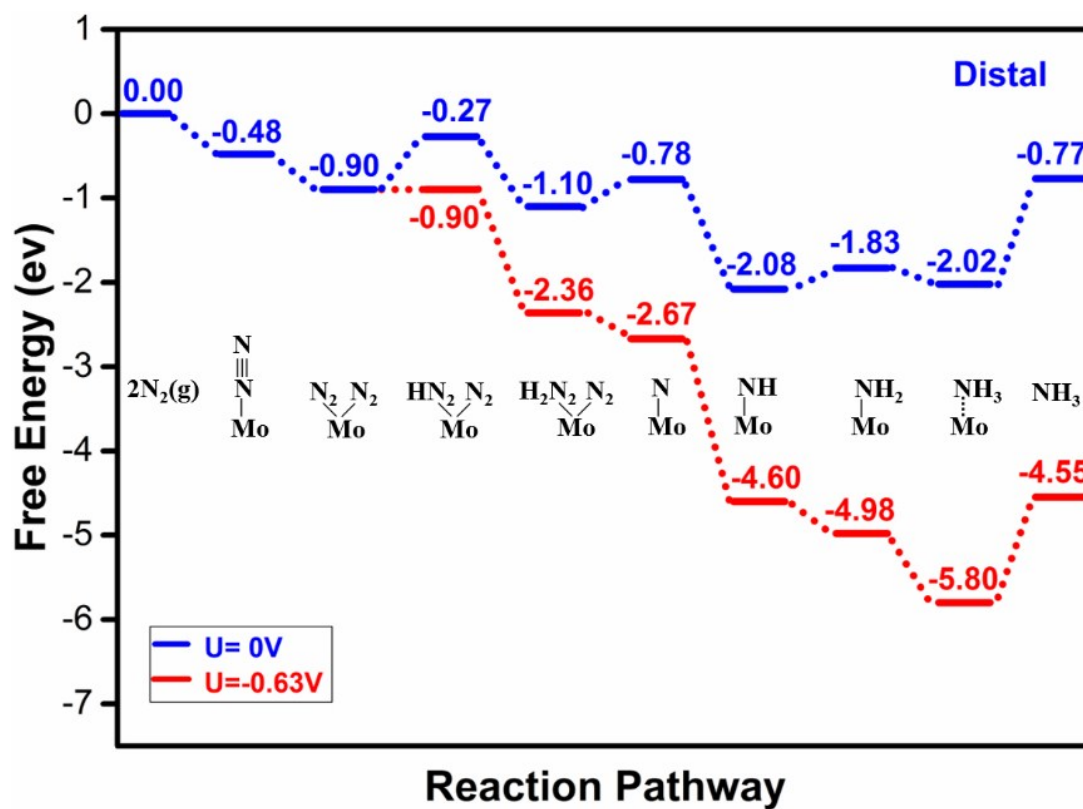

Figure S1. Calculated free energy diagrams for NRR on Mo-PTA through distal mechanism when two  $\text{N}_2^*$  are coadsorbed in the reaction state at different applied potentials.

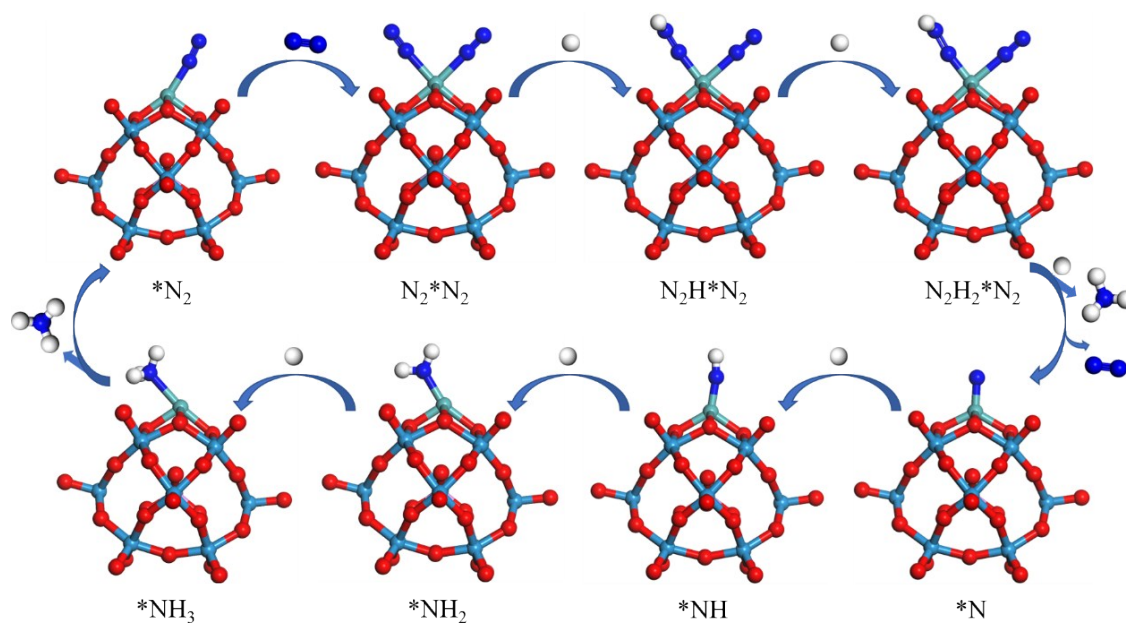

Figure S2. The optimized structures of the intermediates on Mo-PTA following the distal mechanism when two nitrogen molecules are coadsorbed in the reaction state.

Color scheme: P, pink; O, red; W, blue; Mo, cyan; N, navy blue; and H, white.

For the coadsorption of  $^*\text{N}_2$  and  $^*\text{H}$ , when  $\text{N}_2$  firstly adsorbed on Mo-PTA, the  $\Delta G$  of second H adsorption is computed by  $\Delta G = (E_{\text{H}^*\text{N}_2} - E_{^*\text{N}_2} - 1/2E_{\text{H}_2}) + (E_{\text{H}^*\text{N}_2} - E_{^*\text{N}_2} - 1/2E_{\text{H}_2})_{\text{ZPE}} - T(S_{\text{H}^*\text{N}_2} - S_{^*\text{N}_2} - 1/2S_{\text{H}_2})$ .

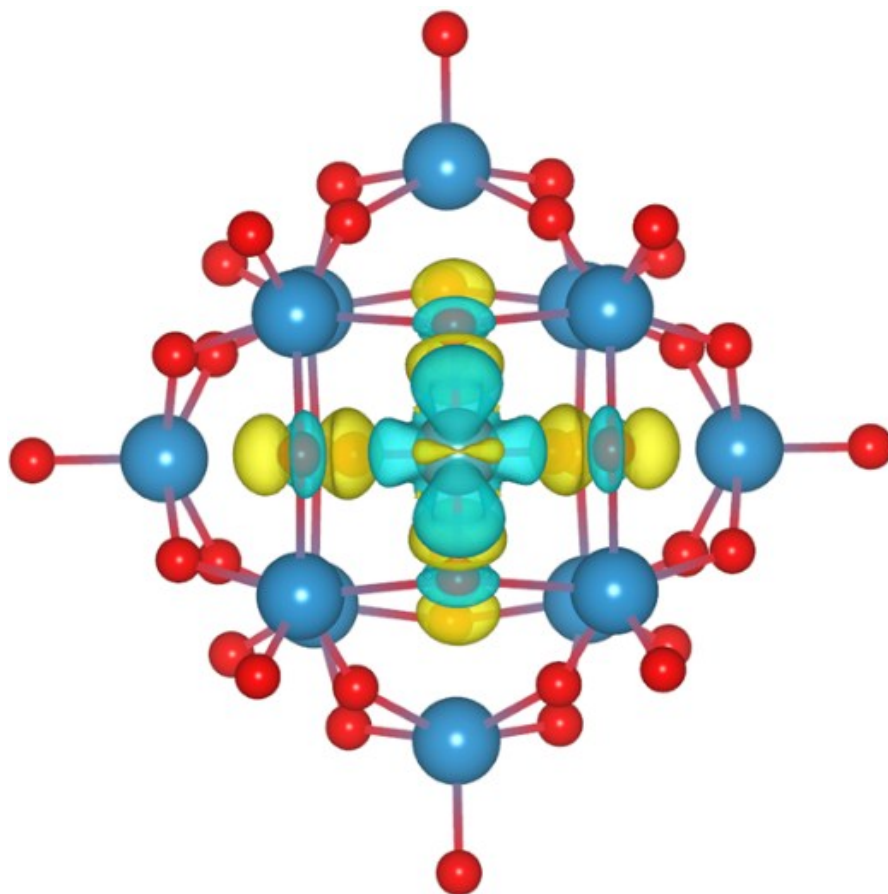

Figure S3. Charge differential density Of Mo-PTA. Isosurface levels is  $0.008 \text{ e } \text{\AA}^{-3}$ , and charge density difference is computed as  $\rho(\text{Mo-PTA}) - \rho(\text{PTA}) - \rho(\text{Mo})$ . Cyan and yellow represent charge depletion and accumulation, respectively
